# Supplementary material for: Non-pharmaceutical interventions and the emergence of pathogen variants
Source: bioRxiv or medRxiv preprint supplement (doi:10.1101/2021.05.27.21257938), 2022-10-02
Supplement: Supplementary file [file media-2.pdf]

## Non-pharmaceutical interventions and the emergence of pathogen variants

### SUPPLEMENTARY MATERIAL

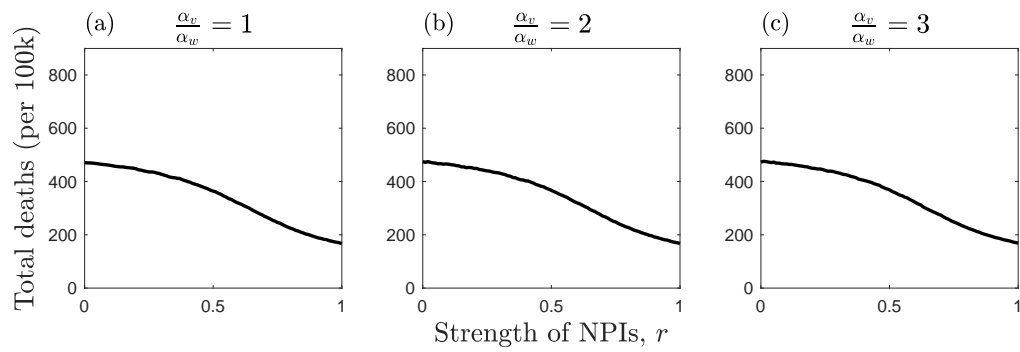

Figure S1 – Effects of NPIs ( $r$ ) and the relative mortality ( $\alpha_v/\alpha_w$ ) of a more transmissible variant ( $\beta_v/\beta_w = 1.5$ ) on total deaths (per 100k) when there is full cross immunity ( $c = 1$ ) and NPIs are delayed ( $\epsilon = 0.2$ ). Plots show the median (black) along with the upper and lower quartiles (grey) over 1,000 simulations. Other parameters as described in the main text.
